# Supplementary material for: Graphene-Enhanced Infrared Near-Field Microscopy
Source: Atypon-hosted journal article supplement (doi:10.1021/nl501376a), 2014-07-14
Supplement: nl501376a_si_001.pdf [file nl501376a_si_001.pdf]

# Graphene-Enhanced Infrared Near-Field Microscopy

Peining Li, Tao Wang, Hannes Böckmann, Thomas Taubner\*

\*taubner@physik.rwth-aachen.de

1st Institute of Physics (IA), RWTH Aachen University, 52056 Aachen, Germany

## Supporting Information:

**Transfer matrix of the graphene layer.** In the transmission calculations, the characteristic matrix of the graphene layer is deduced by using a mathematical trick. We treat the graphene layer as a thin metallic layer with the thickness  $\Delta$  and an equivalent permittivity  $\varepsilon_{\text{eq}} = \varepsilon_0 + i\sigma_g/(\omega\Delta)$ . We employ this equivalent permittivity with the thickness  $\Delta$  into the commonly used characteristic matrix for layered systems and let  $\Delta \rightarrow 0$ . The thickness  $\Delta$  will be cancelled in the formulas. Finally, we obtain the matrix of the graphene as shown in the Method of the main text.

**Transmittance for different graphene positions.** In Fig. S1, we calculate the transmittance of both PMMA-graphene and graphene-PMMA configurations as a function of  $k_x$  at the same wavelength of  $11.3 \mu\text{m}$ . It can be seen that the results of two cases are the same, which means they provide the same enhancement of evanescent fields.

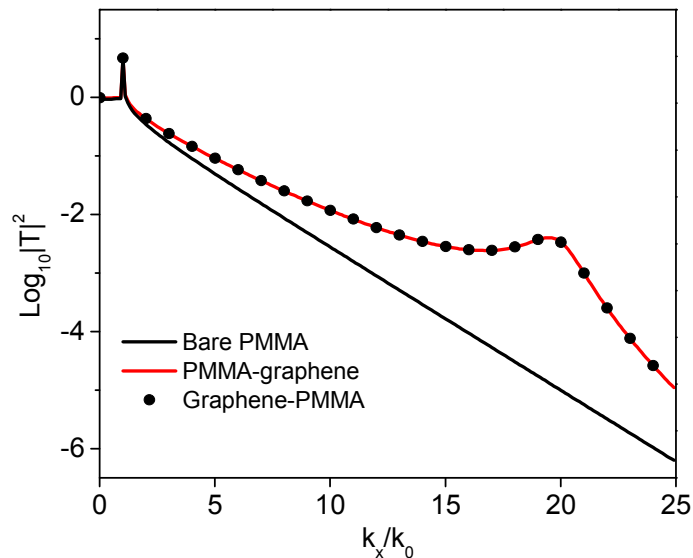

**Fig. S1.** Transmittance as a function of  $k_x$  for both PMMA-graphene and graphene-PMMA configurations at the same wavelength of  $11.3 \mu\text{m}$ . The case with a bare PMMA layer is shown for comparison.

**Wavelength-dependent near-field imaging for the graphene-PMMA configuration.** The wavelength-dependence near-field imaging for the PMMA-graphene configuration is already shown in Fig. 2a. The additional imaging results for the graphene-PMMA case are shown in Fig. S2. For both PMMA-graphene and graphene-PMMA configurations, the infrared contrast of the buried hole becomes weaker with the decrease of the illumination wavelength.

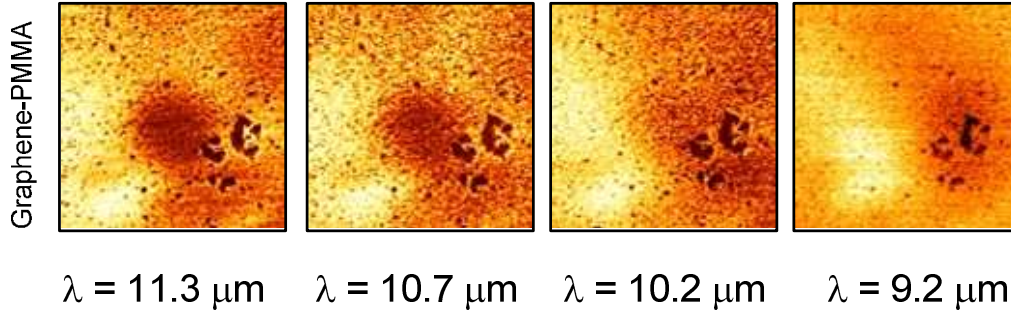

**Fig. S2.** Near-field amplitude images of resolving the buried hole for the graphene-PMMA configuration taken at four different wavelengths.

**Sample information.** Figure S3 shows the typical Raman spectra of monolayer graphene with the PMMA layer. The 2D-peak with a FWHM of  $28 \text{ cm}^{-1}$  (Lorentz fit) is found at the position of  $2680 \text{ cm}^{-1}$  (the 2D/G ratio is about 1.1), indicating an intrinsic *n*-doping ( $\sim 2 \times 10^{13} \text{ cm}^{-2}$ )<sup>1</sup>.

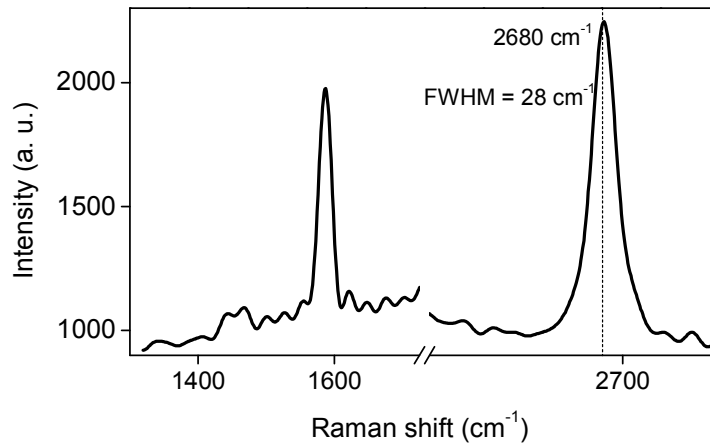

**Fig. S3.** Raman spectra of our monolayer graphene attached with a PMMA layer.

**Enhancement estimation.** We estimate the graphene enhancement by defining a peak visibility as  $V = (F_p - F_b) / (F_p + F_b)$ , where  $F_p$  and  $F_b$  are corresponding values of the grating harmonic peaks and the background. The background value  $F_b$  is defined as the average value of two neighboring positions:  $F_b = (F_A + F_B)/2$ , as sketched in Fig. S4. Then we obtain about 1.8-fold enhancement ( $V_w/V_{w0}$ ,  $V_w$  and  $V_{w0}$  for the cases with and without graphene) for the first-order grating harmonic ( $k_x = 3.8k_0$ ), 3-fold for the second order ( $k_x = 7.5k_0$ ) and 7-fold for the third order ( $k_x = 11.3k_0$ ), respectively.

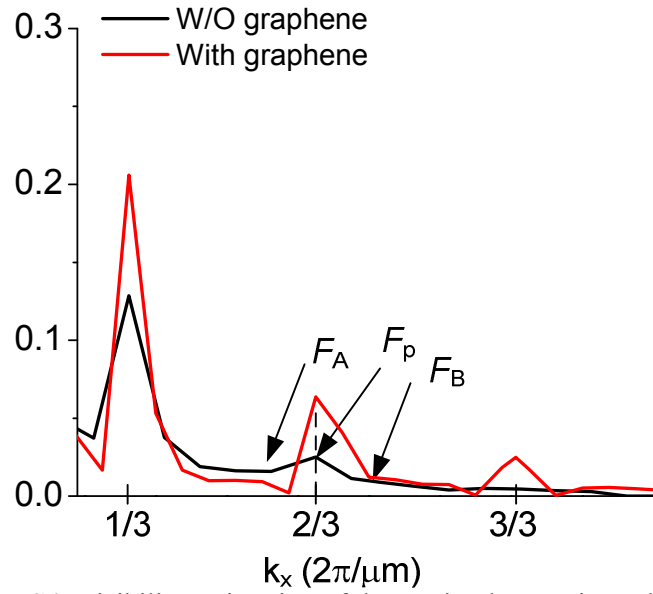

**Fig. S4.** Visibility estimation of the grating harmonic peaks.

**References:**

1. Das, A.; Pisana, S.; Chakraborty, B.; Piscanec, S.; Saha, S. K.; Waghmare, U. V.; Novoselov, K. S.; Krishnamurthy, H. R.; Geim, A. K.; Ferrari, A. C.; Sood, A. K. *Nat. Nanotechnol.* **2008**, 3, 210–5.
